# Supplementary material for: Insights into the effect of distal histidine and water hydrogen bonding on NO ligation to ferrous and ferric heme: a DFT study
Source: Royal Society of Chemistry journal article supplement (doi:10.1039/d1ra08398h), 2022-01-01
Supplement: d1ra08398h1.pdf [file d1ra08398h1.pdf]

## Supplementary information

### **Insights on the effect of distal histidine and water hydrogen bonding on NO ligation to the Ferrous and Ferric Heme: a DFT study**

Fatemeh Fateminasab<sup>a</sup>, Aurelien de la Lande<sup>b</sup> and Reza Omidyan<sup>a\*</sup>

<sup>a</sup>*Department of Chemistry, University of Isfahan, 81746-73441 Isfahan, Iran.*

<sup>b</sup>*Université Paris-Saclay, CNRS, Institut de Chimie Physique, UMR8000, 91405, Orsay, France*

---

This supplementary file contains Figures and Tables:

\*Corresponding author, e-mail: [r.omidyan@sci.ui.ac.ir](mailto:r.omidyan@sci.ui.ac.ir), Fax: (+98) 3136689732

**Figure S1:**

The optimized structures of complexes of ferrous with NO ligand investigated with/without HIS64 (MI) distal group at the OPTX-PBE/DZVP-GGA/GEN-A2\* level of theory.

**Figure S2:**

The optimized structures of complexes of ferric with NO ligand investigated with/without HIS64 (MI) distal group at the OPTX-PBE/DZVP-GGA/GEN-A2\* level of theory.

**Table S1:**

Binding energy in presence of distal group for ferrous complexes at B3LYP/def2-TZVP level of theory

**Table S2:**

Binding energy in presence of distal group for ferric complexes at B3LYP/def2-TZVP level of theory

**Table S3:**

The QTAIM analysis of the topological and energetic features of the electron density distribution  $\rho(r)$  calculated at the band critical points (BCP of Fe-N, N...H<sub>MI</sub>, O...H<sub>MI</sub> and O...H<sub>W</sub>) for ferrous-heme. All values in the table are in atomic units

**Table S4:**

The QTAIM analysis of the topological and energetic features of the electron density distribution  $\rho(r)$  calculated at the band critical points (BCP of Fe-N) for ferric-heme. All values in the table are in atomic units

**Table S5:**

xyz coordinates of the optimized Ferrous-Heme systems.

**Table S6:**

xyz coordinates of the optimized Ferrous-Heme systems.

Figure S1:

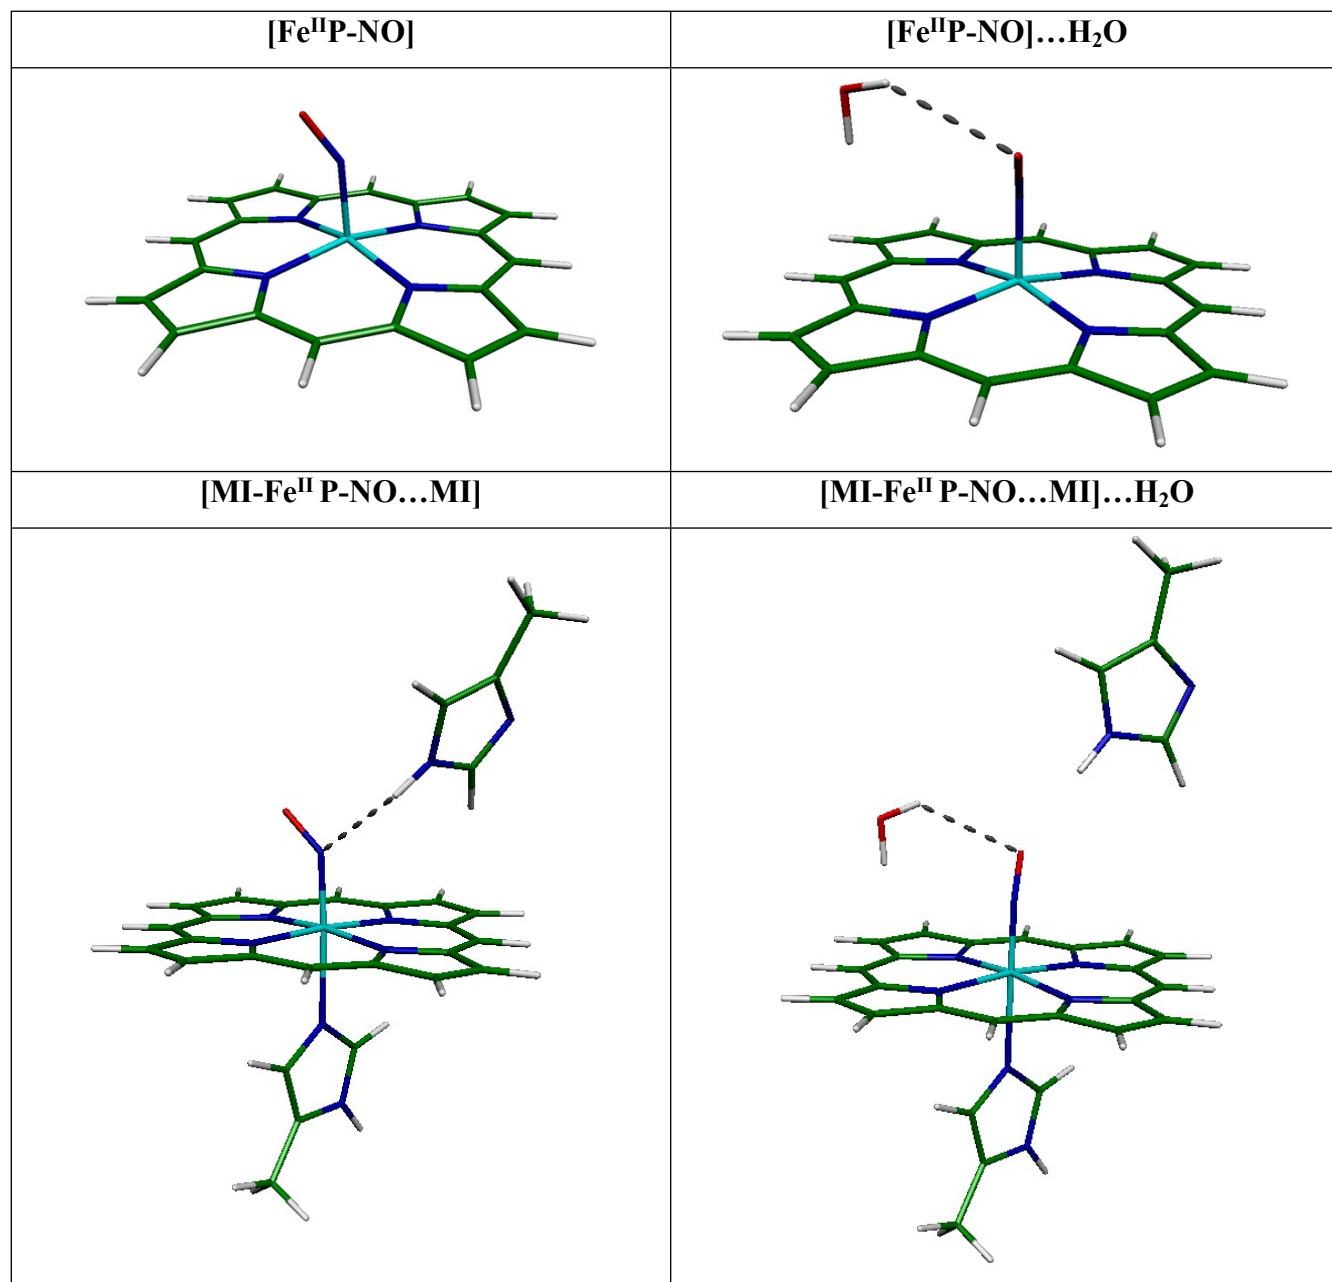

Figure S2:

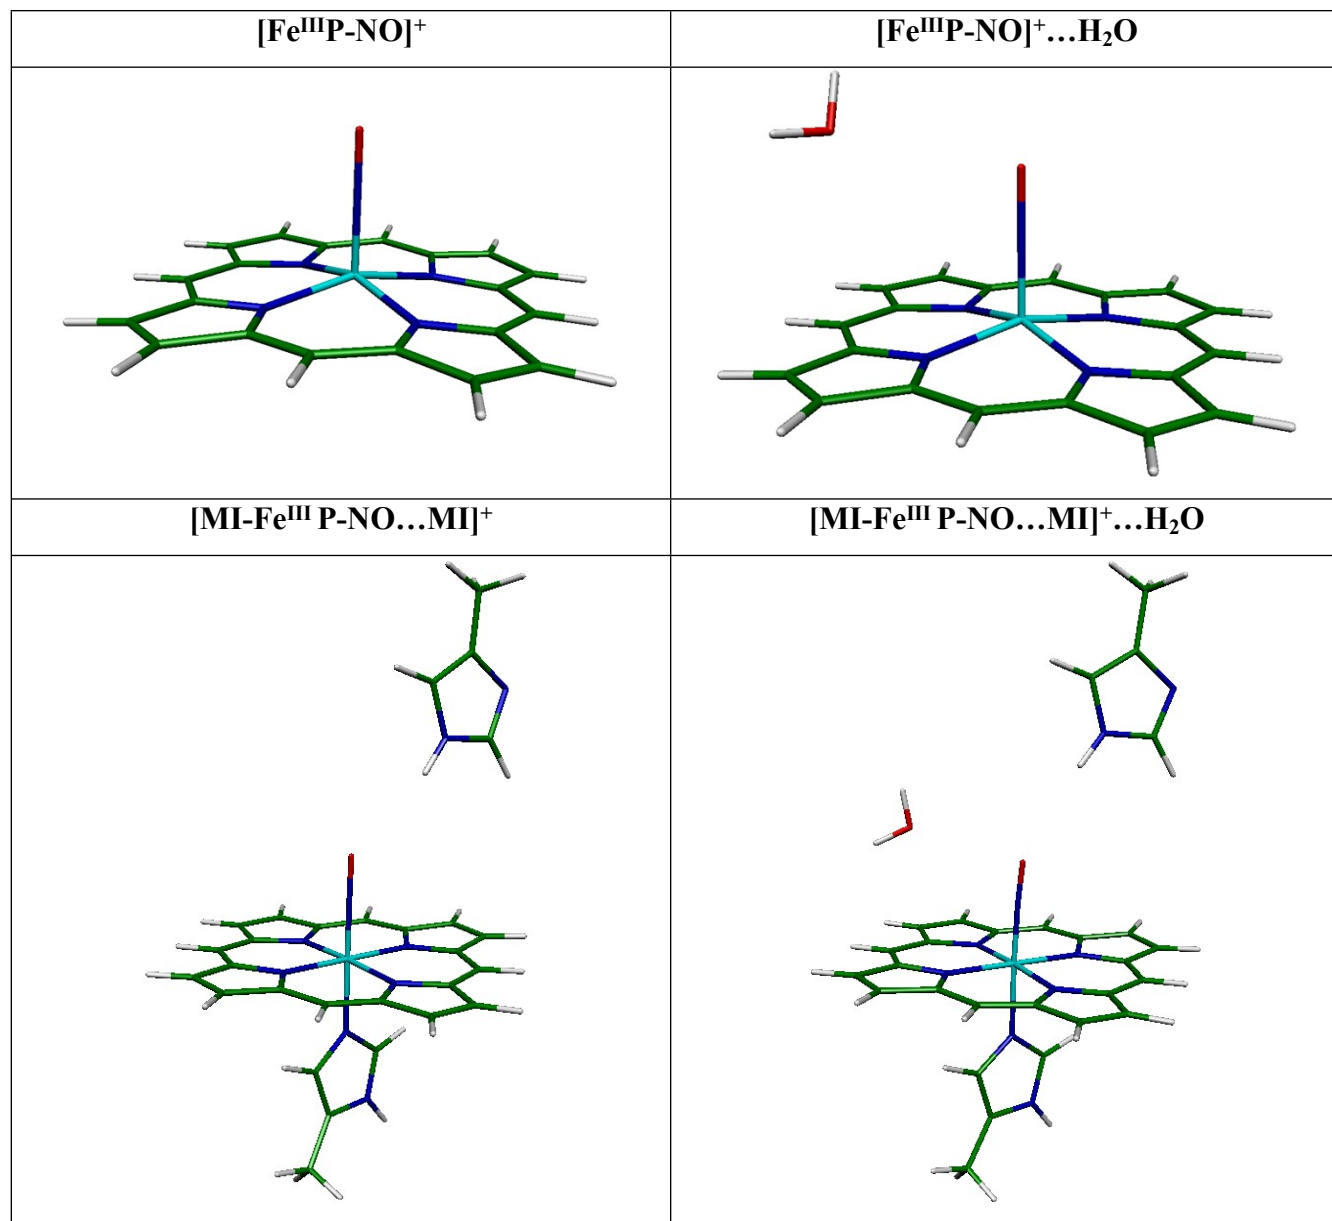

**Table S1:**

$$\Delta E_{\text{binding}} = E_{\text{complex}} (S=1/2, \text{LS}) - (E_{[\text{MI-Fe}^{\text{II}}\text{P}]} (S=2, \text{HS}) + E_{\text{NO}} (S=1/2))$$

$$\Delta E_{\text{binding}} = E_{\text{complex}} (S=1/2, \text{LS}) - (E_{[\text{MI-Fe}^{\text{II}}\text{P} \dots \text{MI}]} (S=2, \text{HS}) + E_{\text{NO}} (S=1/2))$$

| Complex                                            | $\Delta\text{GD3BJ}$ | BSSE   | $\Delta E$ (kcal mol <sup>-1</sup> ) (gas) | $\Delta E_{\text{c}}$ (kcal mol <sup>-1</sup> ) (gas) | $\Delta E$ (kcal mol <sup>-1</sup> ) (solvent) | $\Delta E_{\text{c}}$ (kcal mol <sup>-1</sup> ) (solvent) |
|----------------------------------------------------|----------------------|--------|--------------------------------------------|-------------------------------------------------------|------------------------------------------------|-----------------------------------------------------------|
| <b>Ferrous-Heme</b>                                |                      |        |                                            |                                                       |                                                |                                                           |
| [Fe <sup>II</sup> P-NO]                            | -5.737               | 1.008  | -11.836                                    | -16.565                                               | -10.897                                        | -15.796                                                   |
| [Fe <sup>II</sup> P-NO...MI]                       | -7.386               | 1.082  | -10.237                                    | -16.541                                               | -8.473                                         | -14.777                                                   |
| [MI-Fe <sup>II</sup> P-NO]                         | -5.163               | 1.284  | -14.007                                    | -17.887                                               | -13.007                                        | -16.887                                                   |
| [MI-Fe <sup>II</sup> P-NO...MI]                    | -5.739               | 1.218  | -14.566                                    | -19.087                                               | -12.177                                        | -16.697                                                   |
| <b>Ferrous-Heme (Microhydration effect)</b>        |                      |        |                                            |                                                       |                                                |                                                           |
| [Fe <sup>II</sup> P-NO]...H <sub>2</sub> O         | -6.067               | -0.776 | -10.378                                    | -17.221                                               | -9.199                                         | -14.092                                                   |
| [Fe <sup>II</sup> P-NO...MI]...H <sub>2</sub> O    | -8.570               | 1.292  | -12.661                                    | -19.939                                               | -9.717                                         | -16.994                                                   |
| [MI-Fe <sup>II</sup> P-NO]...H <sub>2</sub> O      | -6.097               | 1.354  | -15.081                                    | -19.823                                               | -12.262                                        | -17.004                                                   |
| [MI-Fe <sup>II</sup> P-NO...MI]...H <sub>2</sub> O | -5.832               | 1.483  | -15.236                                    | -19.586                                               | -12.227                                        | -16.576                                                   |

**Table S2:**

$$\Delta E_{\text{binding}} = E_{\text{complex}} (S=0, \text{LS}) - (E_{[\text{MI-Fe}^{\text{III}}\text{P}]^+} (S=5/2, \text{HS}) + E_{\text{NO}} (S=1/2))$$

$$\Delta E_{\text{binding}} = E_{\text{complex}} (S=0, \text{LS}) - (E_{[\text{MI-Fe}^{\text{III}}\text{P} \dots \text{MI}]^+} (S=5/2, \text{HS}) + E_{\text{NO}} (S=1/2))$$

| Complex                                                           | $\Delta\text{GD3BJ}$ | BSSE  | $\Delta E$ (kcal mol <sup>-1</sup> ) (gas) | $\Delta E_{\text{c}}$ (kcal mol <sup>-1</sup> ) (gas) | $\Delta E$ (kcal mol <sup>-1</sup> ) (solvent) | $\Delta E_{\text{c}}$ (kcal mol <sup>-1</sup> ) (solvent) |
|-------------------------------------------------------------------|----------------------|-------|--------------------------------------------|-------------------------------------------------------|------------------------------------------------|-----------------------------------------------------------|
| <b>Ferric-Heme</b>                                                |                      |       |                                            |                                                       |                                                |                                                           |
| [Fe <sup>III</sup> P-NO] <sup>+</sup>                             | -5.570               | 1.211 | -6.810                                     | -11.169                                               | 0.162                                          | -4.197                                                    |
| [Fe <sup>III</sup> P-NO...MI] <sup>+</sup>                        | -3.980               | 1.346 | -5.381                                     | -8.015                                                | 3.096                                          | 0.462                                                     |
| [MI-Fe <sup>III</sup> P-NO] <sup>+</sup>                          | -7.398               | 1.486 | -6.424                                     | -12.336                                               | -4.141                                         | -10.103                                                   |
| [MI-Fe <sup>III</sup> P-NO...MI] <sup>+</sup>                     | -6.010               | 1.606 | -8.884                                     | -13.288                                               | -2.749                                         | -7.152                                                    |
| <b>Ferric-Heme (Microhydration effect)</b>                        |                      |       |                                            |                                                       |                                                |                                                           |
| [Fe <sup>III</sup> P-NO] <sup>+</sup> ...H <sub>2</sub> O         | -6.108               | 1.294 | -3.302                                     | -8.115                                                | 4.131                                          | -0.682                                                    |
| [Fe <sup>III</sup> P-NO...MI] <sup>+</sup> ...H <sub>2</sub> O    | -5.877               | 1.327 | -0.373                                     | -4.923                                                | 7.103                                          | 2.553                                                     |
| [MI-Fe <sup>III</sup> P-NO] <sup>+</sup> ...H <sub>2</sub> O      | -7.632               | 1.601 | -7.050                                     | -13.081                                               | -2.824                                         | -8.855                                                    |
| [MI-Fe <sup>III</sup> P-NO...MI] <sup>+</sup> ...H <sub>2</sub> O | -4.685               | 1.640 | -4.649                                     | -7.694                                                | 0.260                                          | -2.786                                                    |

**Table S3:**

| Complex                                             |                     | $\rho_{\text{BCP}}$ | $\nabla\rho^2_{\text{BCP}}$ | $V_{\text{BCP}}$ | $G_{\text{BCP}}$ | $H_{\text{BCP}}$ | $H_{\text{BCP}}/\rho_{\text{BCP}}$ | $ V_{\text{BCP}} /G_{\text{BCP}}$ | $G_{\text{BCP}}/\rho_{\text{BCP}}$ |
|-----------------------------------------------------|---------------------|---------------------|-----------------------------|------------------|------------------|------------------|------------------------------------|-----------------------------------|------------------------------------|
| <b>a) Ferrous-Heme</b>                              |                     |                     |                             |                  |                  |                  |                                    |                                   |                                    |
| [Fe <sup>II</sup> P-NO]                             | Fe-N                | 0.188               | 0.810                       | -0.376           | 0.289            | -0.087           | -0.462                             | 1.300                             | 1.537                              |
| [Fe <sup>II</sup> P-NO...MI]                        | Fe-N                | 0.189               | 0.799                       | -0.376           | 0.288            | -0.088           | -0.465                             | 1.306                             | 1.522                              |
| [MI-Fe <sup>II</sup> P-NO]                          | Fe-N                | 0.169               | 0.788                       | -0.339           | 0.268            | -0.071           | -0.418                             | 1.264                             | 1.581                              |
| [MI-Fe <sup>II</sup> P-NO...MI]                     | Fe-N                | 0.173               | 0.824                       | -0.344           | 0.275            | -0.069           | -0.398                             | 1.251                             | 1.587                              |
|                                                     | N...H <sub>MI</sub> | 0.006               | 0.021                       | -0.003           | 0.004            | 0.001            | 0.187                              | 0.728                             | 0.689                              |
| <b>b) Ferrous-Heme (Microhydration effect)</b>      |                     |                     |                             |                  |                  |                  |                                    |                                   |                                    |
| [Fe <sup>II</sup> P-NO] ...H <sub>2</sub> O         | Fe-N                | 0.192               | 0.788                       | -0.387           | 0.292            | -0.095           | -0.494                             | 1.325                             | 1.520                              |
|                                                     | N...H <sub>w</sub>  | 0.003               | 0.011                       | -0.002           | 0.002            | 0.001            | 0.206                              | 0.704                             | 0.698                              |
| [Fe <sup>II</sup> P-NO...MI] ...H <sub>2</sub> O    | Fe-N                | 0.194               | 0.784                       | -0.384           | 0.290            | -0.094           | -0.485                             | 1.324                             | 1.494                              |
|                                                     | O...H <sub>w</sub>  | 0.004               | 0.014                       | -0.002           | 0.003            | 0.001            | 0.222                              | 0.687                             | 0.709                              |
|                                                     | O...H <sub>MI</sub> | 0.006               | 0.023                       | -0.003           | 0.004            | 0.001            | 0.244                              | 0.677                             | 0.755                              |
| [MI-Fe <sup>II</sup> P-NO]...H <sub>2</sub> O       | Fe-N                | 0.176               | 0.830                       | -0.351           | 0.279            | -0.072           | -0.407                             | 1.257                             | 1.584                              |
|                                                     | O...H <sub>w</sub>  | 0.005               | 0.017                       | -0.002           | 0.003            | 0.001            | 0.228                              | 0.682                             | 0.716                              |
| [MI-Fe <sup>II</sup> P-NO...MI] ...H <sub>2</sub> O | Fe-N                | 0.176               | 0.820                       | -0.349           | 0.277            | -0.072           | -0.408                             | 1.260                             | 1.572                              |
|                                                     | O...H <sub>w</sub>  | 0.004               | 0.017                       | -0.002           | 0.003            | 0.001            | 0.229                              | 0.681                             | 0.719                              |

**Table S4:**

| Complex                                                           |      | $\rho_{\text{BCP}}$ | $\nabla\rho^2_{\text{BCP}}$ | $V_{\text{BCP}}$ | $G_{\text{BCP}}$ | $H_{\text{BCP}}$ | $H_{\text{BCP}}/\rho_{\text{BCP}}$ | $ V_{\text{BCP}} /G_{\text{BCP}}$ | $G_{\text{BCP}}/\rho_{\text{BCP}}$ |
|-------------------------------------------------------------------|------|---------------------|-----------------------------|------------------|------------------|------------------|------------------------------------|-----------------------------------|------------------------------------|
| <b>a) Ferric-Heme</b>                                             |      |                     |                             |                  |                  |                  |                                    |                                   |                                    |
| [Fe <sup>III</sup> P-NO] <sup>+</sup>                             | Fe-N | 0.220               | 1.385                       | -0.568           | 0.457            | -0.111           | -0.505                             | 1.243                             | 2.079                              |
| [Fe <sup>III</sup> P-NO...MI] <sup>+</sup>                        | Fe-N | 0.217               | 1.342                       | -0.550           | 0.443            | -0.107           | -0.495                             | 1.242                             | 2.045                              |
| [MI-Fe <sup>III</sup> P-NO] <sup>+</sup>                          | Fe-N | 0.197               | 1.406                       | -0.518           | 0.435            | -0.083           | -0.423                             | 1.192                             | 2.207                              |
| [MI-Fe <sup>III</sup> P-NO...MI] <sup>+</sup>                     | Fe-N | 0.202               | 1.441                       | -0.531           | 0.446            | -0.086           | -0.424                             | 1.192                             | 2.210                              |
| <b>b) Ferric-Heme (Microhydration effect)</b>                     |      |                     |                             |                  |                  |                  |                                    |                                   |                                    |
| [Fe <sup>III</sup> P-NO] <sup>+</sup> ...H <sub>2</sub> O         | Fe-N | 0.218               | 1.394                       | -0.563           | 0.456            | -0.107           | -0.494                             | 1.236                             | 2.094                              |
| [Fe <sup>III</sup> P-NO...MI] <sup>+</sup> ...H <sub>2</sub> O    | Fe-N | 0.218               | 1.276                       | -0.540           | 0.429            | -0.111           | -0.507                             | 1.257                             | 1.968                              |
| [MI-Fe <sup>III</sup> P-NO] <sup>+</sup> ...H <sub>2</sub> O      | Fe-N | 0.202               | 1.445                       | -0.532           | 0.446            | -0.085           | -0.423                             | 1.191                             | 2.215                              |
| [MI-Fe <sup>III</sup> P-NO...MI] <sup>+</sup> ...H <sub>2</sub> O | Fe-N | 0.200               | 1.426                       | -0.525           | 0.441            | -0.084           | -0.421                             | 1.191                             | 2.201                              |

Table S5:

| <i>Ferrous-Heme</i>               |           |           |          |                                                      |           |           |           |
|-----------------------------------|-----------|-----------|----------|------------------------------------------------------|-----------|-----------|-----------|
| [MI-Fe <sup>II</sup> -P-NO], Ms=2 |           |           |          | [MI-Fe <sup>II</sup> -P-NO]...H <sub>2</sub> O, Ms=2 |           |           |           |
| C                                 | 9.483977  | 29.187638 | 2.539124 | C                                                    | 8.197362  | 28.538742 | 2.147696  |
| H                                 | 8.576827  | 29.050742 | 3.169765 | H                                                    | 7.363992  | 28.134443 | 2.765888  |
| H                                 | 9.522139  | 28.356550 | 1.806929 | H                                                    | 8.366354  | 27.845217 | 1.300287  |
| C                                 | 10.728662 | 29.192235 | 3.367708 | C                                                    | 9.452362  | 28.674625 | 2.950419  |
| N                                 | 10.967347 | 30.104213 | 4.383070 | N                                                    | 9.565882  | 29.503813 | 4.054453  |
| H                                 | 10.335945 | 30.848605 | 4.665451 | H                                                    | 8.828387  | 30.098962 | 4.422143  |
| C                                 | 11.851339 | 28.391775 | 3.356462 | C                                                    | 10.693012 | 28.081647 | 2.837743  |
| H                                 | 12.078249 | 27.537369 | 2.706002 | H                                                    | 11.038035 | 27.350891 | 2.095327  |
| C                                 | 12.181219 | 29.833919 | 4.931150 | C                                                    | 10.826570 | 29.388649 | 4.552557  |
| H                                 | 12.625231 | 30.397229 | 5.758798 | H                                                    | 11.199748 | 29.933454 | 5.426893  |
| N                                 | 12.750390 | 28.795815 | 4.329145 | N                                                    | 11.540444 | 28.528801 | 3.836249  |
| FE                                | 14.746883 | 27.913188 | 4.853245 | FE                                                   | 13.740100 | 27.961370 | 4.221018  |
| C                                 | 15.996375 | 31.112605 | 5.123776 | C                                                    | 14.416966 | 31.326284 | 4.515945  |
| H                                 | 16.422258 | 32.123330 | 5.209824 | H                                                    | 14.670963 | 32.393165 | 4.605596  |
| C                                 | 13.790681 | 28.021994 | 8.164421 | C                                                    | 13.034307 | 27.823073 | 7.602170  |
| H                                 | 13.509199 | 28.043889 | 9.228144 | H                                                    | 12.842619 | 27.768724 | 8.684243  |
| C                                 | 13.333880 | 24.793970 | 4.559969 | C                                                    | 12.886517 | 24.636718 | 3.926232  |
| H                                 | 12.912223 | 23.782582 | 4.461069 | H                                                    | 12.655499 | 23.564850 | 3.833424  |
| C                                 | 15.532091 | 27.891356 | 1.510598 | C                                                    | 14.258238 | 28.140798 | 0.832627  |
| H                                 | 15.809461 | 27.865249 | 0.446753 | H                                                    | 14.450121 | 28.193522 | -0.249033 |
| N                                 | 14.868894 | 29.304755 | 6.357598 | N                                                    | 13.724968 | 29.313958 | 5.760058  |
| C                                 | 15.458110 | 30.543932 | 6.284967 | C                                                    | 14.092772 | 30.638169 | 5.693482  |
| C                                 | 15.417144 | 31.190764 | 7.576822 | C                                                    | 14.056598 | 31.233705 | 7.009560  |
| C                                 | 14.794108 | 30.318201 | 8.432618 | C                                                    | 13.664656 | 30.246167 | 7.877381  |
| C                                 | 14.459471 | 29.144255 | 7.658775 | C                                                    | 13.463918 | 29.053452 | 7.085852  |
| N                                 | 13.749900 | 26.651246 | 6.113672 | N                                                    | 13.057624 | 26.522077 | 5.503566  |
| C                                 | 13.466496 | 26.869146 | 7.439659 | C                                                    | 12.851353 | 26.651601 | 6.855700  |
| C                                 | 12.763059 | 25.732240 | 7.993963 | C                                                    | 12.401423 | 25.396151 | 7.418376  |
| C                                 | 12.634022 | 24.819317 | 6.981121 | C                                                    | 12.360688 | 24.497173 | 6.386257  |
| C                                 | 13.257834 | 25.406285 | 5.815573 | C                                                    | 12.780009 | 25.212557 | 5.200016  |
| N                                 | 14.485739 | 26.608725 | 3.341579 | N                                                    | 13.613976 | 26.649235 | 2.691083  |
| C                                 | 13.924240 | 25.354598 | 3.421353 | C                                                    | 13.293734 | 25.312216 | 2.768582  |
| C                                 | 13.998955 | 24.691993 | 2.140130 | C                                                    | 13.397951 | 24.696619 | 1.465734  |
| C                                 | 14.618152 | 25.562267 | 1.281457 | C                                                    | 13.781035 | 25.682286 | 0.593657  |
| C                                 | 14.917172 | 26.752683 | 2.042131 | C                                                    | 13.910483 | 26.894658 | 1.369122  |
| N                                 | 15.593834 | 29.242969 | 3.563351 | N                                                    | 14.216038 | 29.437642 | 2.930924  |
| C                                 | 15.843514 | 29.051378 | 2.228522 | C                                                    | 14.399666 | 29.321157 | 1.573157  |
| C                                 | 16.471627 | 30.224615 | 1.662004 | C                                                    | 14.757062 | 30.600285 | 1.001707  |
| C                                 | 16.600127 | 31.129293 | 2.681684 | C                                                    | 14.802450 | 31.493931 | 2.039071  |
| C                                 | 16.051848 | 30.501982 | 3.864982 | C                                                    | 14.474598 | 30.754345 | 3.238237  |

|   |           |           |          |   |           |           |           |
|---|-----------|-----------|----------|---|-----------|-----------|-----------|
| O | 17.037190 | 26.399164 | 4.845625 | O | 16.411725 | 27.543743 | 3.813808  |
| H | 9.369294  | 30.140303 | 1.974262 | H | 7.873017  | 29.520244 | 1.733090  |
| H | 12.420674 | 25.643532 | 9.036424 | H | 12.160518 | 25.227199 | 8.480049  |
| H | 12.165075 | 23.824291 | 7.018299 | H | 12.079179 | 23.433409 | 6.419820  |
| H | 13.613008 | 23.683653 | 1.927868 | H | 13.191940 | 23.636698 | 1.249609  |
| H | 14.847266 | 25.417006 | 0.215066 | H | 13.954939 | 25.604387 | -0.491095 |
| H | 16.783943 | 30.333879 | 0.612608 | H | 14.950782 | 30.784486 | -0.066395 |
| H | 17.037532 | 32.138297 | 2.643883 | H | 15.042368 | 32.568317 | 2.004427  |
| H | 15.820512 | 32.191228 | 7.800077 | H | 14.306659 | 32.282574 | 7.235901  |
| H | 14.579384 | 30.451682 | 9.503890 | H | 13.522845 | 30.311308 | 8.968070  |
| N | 16.258269 | 27.211913 | 5.229134 | O | 16.427902 | 24.268794 | 5.156057  |
|   |           |           |          | H | 16.829488 | 25.084879 | 4.813498  |
|   |           |           |          | H | 15.475615 | 24.459128 | 5.109916  |
|   |           |           |          | N | 15.394925 | 27.585848 | 4.435312  |



| <b>[MI-Fe<sup>II</sup>-P-NO...MI], Ms=2</b> |           |           |          | <b>[MI-Fe<sup>II</sup>-P-NO...MI]...H<sub>2</sub>O, Ms=2</b> |           |           |           |
|---------------------------------------------|-----------|-----------|----------|--------------------------------------------------------------|-----------|-----------|-----------|
| C                                           | 22.907000 | 29.056000 | 6.205000 | C                                                            | 22.907000 | 29.056000 | 6.205000  |
| H                                           | 23.291812 | 30.084863 | 6.026582 | H                                                            | 23.445987 | 30.006459 | 6.006145  |
| H                                           | 23.485789 | 28.353634 | 5.566044 | H                                                            | 23.462530 | 28.225283 | 5.715678  |
| C                                           | 21.441000 | 28.978393 | 5.911044 | C                                                            | 21.497982 | 29.136627 | 5.727523  |
| N                                           | 20.519294 | 29.729003 | 6.625812 | N                                                            | 20.691457 | 30.201754 | 6.089189  |
| C                                           | 20.796447 | 28.204250 | 4.961116 | C                                                            | 20.797922 | 28.244969 | 4.932984  |
| H                                           | 21.176348 | 27.487551 | 4.223635 | H                                                            | 21.086830 | 27.293889 | 4.468065  |
| C                                           | 19.339333 | 29.403221 | 6.108619 | C                                                            | 19.521903 | 29.944323 | 5.524789  |
| H                                           | 18.364862 | 29.803863 | 6.417463 | H                                                            | 18.648000 | 30.582000 | 5.610000  |
| N                                           | 19.456325 | 28.485180 | 5.109108 | N                                                            | 19.528604 | 28.775659 | 4.827066  |
| H                                           | 18.688634 | 28.097283 | 4.570218 | H                                                            | 18.749020 | 28.391536 | 4.305614  |
| C                                           | 9.738639  | 29.249592 | 2.276280 | C                                                            | 8.185009  | 28.364909 | 2.152878  |
| H                                           | 8.796579  | 29.011461 | 2.821192 | H                                                            | 7.337960  | 27.994453 | 2.772519  |
| H                                           | 9.878898  | 28.493230 | 1.479845 | H                                                            | 8.384775  | 27.621558 | 1.357066  |
| C                                           | 10.915728 | 29.236182 | 3.201347 | C                                                            | 9.417486  | 28.561466 | 2.979134  |
| N                                           | 11.041484 | 30.080712 | 4.291268 | N                                                            | 9.487330  | 29.417190 | 4.066349  |
| H                                           | 10.367189 | 30.786465 | 4.574841 | H                                                            | 8.727303  | 29.997202 | 4.410560  |
| C                                           | 12.063122 | 28.471261 | 3.225921 | C                                                            | 10.677999 | 28.009243 | 2.895029  |
| H                                           | 12.365486 | 27.675872 | 2.535184 | H                                                            | 11.054127 | 27.279872 | 2.167629  |
| C                                           | 12.217614 | 29.807296 | 4.917799 | C                                                            | 10.745603 | 29.356447 | 4.583351  |
| H                                           | 12.574031 | 30.327580 | 5.811681 | H                                                            | 11.084787 | 29.935232 | 5.448033  |
| N                                           | 12.866150 | 28.829484 | 4.295276 | N                                                            | 11.497137 | 28.502194 | 3.897280  |
| FE                                          | 14.836915 | 27.941258 | 4.926003 | FE                                                           | 13.714864 | 28.016519 | 4.230966  |
| C                                           | 16.003608 | 31.187049 | 5.199572 | C                                                            | 14.311587 | 31.406087 | 4.422288  |
| H                                           | 16.393506 | 32.214704 | 5.287312 | H                                                            | 14.546243 | 32.480584 | 4.493617  |
| C                                           | 13.802157 | 28.059772 | 8.198176 | C                                                            | 13.037044 | 27.938841 | 7.592732  |
| H                                           | 13.509457 | 28.065424 | 9.261147 | H                                                            | 12.852678 | 27.899714 | 8.678478  |
| C                                           | 13.419889 | 24.840642 | 4.570100 | C                                                            | 12.874578 | 24.691906 | 3.970410  |
| H                                           | 12.981014 | 23.835224 | 4.467007 | H                                                            | 12.644177 | 23.616157 | 3.905895  |
| C                                           | 15.806109 | 27.893168 | 1.630370 | C                                                            | 14.260498 | 28.129319 | 0.825829  |
| H                                           | 16.148450 | 27.858678 | 0.582640 | H                                                            | 14.479829 | 28.159897 | -0.253957 |
| N                                           | 14.894825 | 29.343726 | 6.404551 | N                                                            | 13.659982 | 29.396745 | 5.704159  |
| C                                           | 15.447068 | 30.603389 | 6.341761 | C                                                            | 13.988819 | 30.731942 | 5.605562  |
| C                                           | 15.373687 | 31.250695 | 7.630813 | C                                                            | 13.928190 | 31.360768 | 6.903255  |
| C                                           | 14.768530 | 30.362769 | 8.481568 | C                                                            | 13.570800 | 30.385339 | 7.798694  |
| C                                           | 14.472511 | 29.182729 | 7.704114 | C                                                            | 13.413836 | 29.167421 | 7.040730  |
| N                                           | 13.779561 | 26.725652 | 6.118919 | N                                                            | 13.068167 | 26.611815 | 5.511685  |
| C                                           | 13.489723 | 26.921056 | 7.450173 | C                                                            | 12.892575 | 26.750543 | 6.870218  |
| C                                           | 12.768848 | 25.786943 | 7.980191 | C                                                            | 12.491347 | 25.493123 | 7.458121  |
| C                                           | 12.647215 | 24.886309 | 6.956783 | C                                                            | 12.441739 | 24.581351 | 6.438466  |
| C                                           | 13.297275 | 25.475069 | 5.809344 | C                                                            | 12.814377 | 25.287281 | 5.233747  |
| N                                           | 14.647874 | 26.635018 | 3.411511 | N                                                            | 13.566869 | 26.681025 | 2.695844  |
| C                                           | 14.072702 | 25.384679 | 3.461028 | C                                                            | 13.237054 | 25.349316 | 2.789299  |
| C                                           | 14.224883 | 24.708018 | 2.195231 | C                                                            | 13.341748 | 24.711067 | 1.497547  |
| C                                           | 14.908874 | 25.565052 | 1.372847 | C                                                            | 13.748336 | 25.678533 | 0.616330  |

|                                                     |           |           |           |                                                                      |           |           |           |
|-----------------------------------------------------|-----------|-----------|-----------|----------------------------------------------------------------------|-----------|-----------|-----------|
| C                                                   | 15.166182 | 26.759764 | 2.141540  | C                                                                    | 13.886978 | 26.898973 | 1.375870  |
| N                                                   | 15.710528 | 29.279246 | 3.664403  | N                                                                    | 14.148905 | 29.481982 | 2.887516  |
| C                                                   | 16.053573 | 29.065586 | 2.350752  | C                                                                    | 14.387456 | 29.323407 | 1.542232  |
| C                                                   | 16.693939 | 30.237110 | 1.797500  | C                                                                    | 14.761278 | 30.585803 | 0.943551  |
| C                                                   | 16.737569 | 31.167696 | 2.800034  | C                                                                    | 14.768375 | 31.509678 | 1.953820  |
| C                                                   | 16.128226 | 30.554986 | 3.958860  | C                                                                    | 14.400606 | 30.805512 | 3.161269  |
| O                                                   | 16.722349 | 26.103703 | 5.682405  | O                                                                    | 16.059325 | 27.491818 | 5.531036  |
| H                                                   | 9.615223  | 30.245613 | 1.795468  | H                                                                    | 7.867450  | 29.316335 | 1.669054  |
| H                                                   | 23.107364 | 28.810743 | 7.269509  | H                                                                    | 22.934000 | 28.879000 | 7.306000  |
| H                                                   | 12.409414 | 25.699031 | 9.017567  | N                                                                    | 15.351938 | 27.659024 | 4.581331  |
| H                                                   | 12.167412 | 23.895532 | 6.969293  | H                                                                    | 12.269753 | 25.338997 | 8.525818  |
| H                                                   | 13.850748 | 23.697082 | 1.971398  | H                                                                    | 12.171398 | 23.514547 | 6.485863  |
| H                                                   | 15.215389 | 25.411338 | 0.325681  | H                                                                    | 13.136037 | 23.647994 | 1.299326  |
| H                                                   | 17.057822 | 30.329170 | 0.761849  | H                                                                    | 13.943106 | 25.581307 | -0.464362 |
| H                                                   | 17.152368 | 32.187692 | 2.768600  | H                                                                    | 14.997937 | 30.734908 | -0.122491 |
| H                                                   | 15.750776 | 32.261910 | 7.852255  | H                                                                    | 15.013480 | 32.582112 | 1.897522  |
| H                                                   | 14.537922 | 30.489507 | 9.551620  | H                                                                    | 14.141821 | 32.423573 | 7.100876  |
| N                                                   | 16.298338 | 27.182910 | 5.408423  | H                                                                    | 13.429417 | 30.475725 | 8.887606  |
|                                                     |           |           |           | O                                                                    | 16.607179 | 24.446018 | 3.922263  |
|                                                     |           |           |           | H                                                                    | 16.910238 | 25.066059 | 4.605850  |
|                                                     |           |           |           | H                                                                    | 15.709274 | 24.760379 | 3.720130  |
| <i><b>Ferric-Heme</b></i>                           |           |           |           |                                                                      |           |           |           |
| <b>[MI-Fe<sup>III</sup>-P-NO]<sup>+</sup>, Ms=1</b> |           |           |           | <b>[MI-Fe<sup>III</sup>-P-NO]<sup>+</sup>...H<sub>2</sub>O, Ms=1</b> |           |           |           |
| C                                                   | -0.347385 | 3.018983  | -0.117736 | C                                                                    | 8.362258  | 28.424513 | 2.170188  |
| C                                                   | 0.403206  | 4.251708  | -0.142342 | H                                                                    | 7.523510  | 28.034003 | 2.787392  |
| C                                                   | 1.713147  | 3.914751  | -0.356938 | H                                                                    | 8.544933  | 27.704678 | 1.347747  |
| C                                                   | 1.769562  | 2.474086  | -0.430252 | C                                                                    | 9.601939  | 28.598667 | 2.985554  |
| N                                                   | 0.501094  | 1.941828  | -0.290113 | N                                                                    | 9.689728  | 29.449545 | 4.077660  |
| H                                                   | -0.023305 | 5.256104  | -0.023076 | H                                                                    | 8.935125  | 30.028634 | 4.434285  |
| H                                                   | 2.578229  | 4.586388  | -0.440583 | C                                                                    | 10.850638 | 28.030369 | 2.882786  |
| C                                                   | 2.956774  | 1.749515  | -0.539229 | H                                                                    | 11.206519 | 27.301954 | 2.152823  |
| H                                                   | 3.901164  | 2.308414  | -0.635512 | C                                                                    | 10.939841 | 29.386716 | 4.593931  |
| C                                                   | 3.017851  | 0.359599  | -0.440518 | H                                                                    | 11.279861 | 29.954260 | 5.457130  |
| C                                                   | 2.468248  | -1.761220 | -0.152831 | N                                                                    | 11.674335 | 28.527095 | 3.885277  |
| C                                                   | 3.910288  | -1.703742 | -0.198679 | FE                                                                   | 13.622913 | 28.031810 | 4.249648  |
| H                                                   | 5.256551  | 0.038548  | -0.487309 | C                                                                    | 14.387304 | 31.391591 | 4.486102  |
| H                                                   | 4.582597  | -2.566571 | -0.103059 | H                                                                    | 14.664978 | 32.454904 | 4.563607  |
| N                                                   | 1.938237  | -0.492531 | -0.297012 | C                                                                    | 12.968902 | 27.943237 | 7.634573  |
| C                                                   | 4.249934  | -0.391209 | -0.396114 | H                                                                    | 12.799484 | 27.901269 | 8.722662  |
| C                                                   | 1.737886  | -2.946980 | -0.043783 | C                                                                    | 12.800723 | 24.695011 | 4.004847  |
| H                                                   | 2.292931  | -3.889665 | 0.086967  | H                                                                    | 12.554173 | 23.622411 | 3.931272  |
| C                                                   | 0.346571  | -3.010421 | -0.151347 | C                                                                    | 14.320523 | 28.114775 | 0.876714  |
| C                                                   | -1.774827 | -2.461919 | -0.437895 | H                                                                    | 14.571439 | 28.136617 | -0.196826 |
| C                                                   | -1.715964 | -3.903579 | -0.393820 | N                                                                    | 13.655746 | 29.384782 | 5.741026  |
| H                                                   | 0.025010  | -5.249961 | -0.101600 | C                                                                    | 14.049841 | 30.710048 | 5.655773  |

|                                                          |           |           |           |                                                                           |           |           |           |
|----------------------------------------------------------|-----------|-----------|-----------|---------------------------------------------------------------------------|-----------|-----------|-----------|
| H                                                        | -2.580069 | -4.575348 | -0.484972 | C                                                                         | 14.048432 | 31.313912 | 6.965760  |
| N                                                        | -0.505835 | -1.931456 | -0.294638 | C                                                                         | 13.655145 | 30.344239 | 7.852112  |
| C                                                        | -0.403382 | -4.243467 | -0.197004 | C                                                                         | 13.413880 | 29.146456 | 7.083918  |
| C                                                        | -2.960481 | -1.734097 | -0.538336 | N                                                                         | 12.958747 | 26.633821 | 5.530299  |
| H                                                        | -3.907212 | -2.288817 | -0.635301 | C                                                                         | 12.745318 | 26.785256 | 6.888863  |
| C                                                        | -3.018271 | -0.344363 | -0.429566 | C                                                                         | 12.294797 | 25.538401 | 7.463408  |
| C                                                        | -2.467253 | 1.771139  | -0.117513 | C                                                                         | 12.246681 | 24.625626 | 6.444127  |
| C                                                        | -3.909362 | 1.713276  | -0.143404 | C                                                                         | 12.671890 | 25.312983 | 5.247988  |
| H                                                        | -5.257628 | -0.025800 | -0.442231 | N                                                                         | 13.585697 | 26.687179 | 2.762932  |
| H                                                        | -4.580657 | 2.573571  | -0.024294 | C                                                                         | 13.236821 | 25.352220 | 2.854823  |
| N                                                        | -1.937469 | 0.506208  | -0.288295 | C                                                                         | 13.365444 | 24.715145 | 1.567127  |
| C                                                        | -4.250481 | 0.404298  | -0.357851 | C                                                                         | 13.800032 | 25.673377 | 0.689098  |
| C                                                        | -1.736329 | 2.954032  | 0.010404  | C                                                                         | 13.931867 | 26.898420 | 1.439310  |
| H                                                        | -2.289458 | 3.893655  | 0.165713  | N                                                                         | 14.165875 | 29.462041 | 2.947722  |
| Fe                                                       | -0.000319 | 0.004916  | -0.228312 | C                                                                         | 14.408482 | 29.307371 | 1.595991  |
| N                                                        | -0.001594 | 0.002972  | -2.246007 | C                                                                         | 14.803814 | 30.567505 | 1.011547  |
| C                                                        | 0.539549  | -0.921548 | -3.040410 | C                                                                         | 14.809426 | 31.490145 | 2.023086  |
| C                                                        | -0.569015 | 0.966246  | -3.070454 | C                                                                         | 14.421933 | 30.792566 | 3.226599  |
| H                                                        | 1.064179  | -1.814331 | -2.702820 | O                                                                         | 16.255880 | 27.399229 | 4.800350  |
| C                                                        | -0.366884 | 0.616567  | -4.385179 | H                                                                         | 8.038008  | 29.386858 | 1.716245  |
| H                                                        | -1.082571 | 1.843651  | -2.672363 | N                                                                         | 15.164831 | 27.658188 | 4.566079  |
| H                                                        | 0.648011  | -1.115684 | -5.139476 | H                                                                         | 12.049540 | 25.385019 | 8.523145  |
| C                                                        | -0.767030 | 1.291954  | -5.657732 | H                                                                         | 11.950933 | 23.569608 | 6.497211  |
| H                                                        | 0.122658  | 1.550439  | -6.272181 | H                                                                         | 13.151270 | 23.658211 | 1.360256  |
| H                                                        | -1.431785 | 0.640735  | -6.265995 | H                                                                         | 14.019825 | 25.559147 | -0.381073 |
| H                                                        | -1.314688 | 2.229093  | -5.432679 | H                                                                         | 15.049088 | 30.724250 | -0.047382 |
| N                                                        | 0.336262  | -0.580087 | -4.334420 | H                                                                         | 15.061219 | 32.557844 | 1.967918  |
| N                                                        | 0.004375  | -0.005605 | 1.391132  | H                                                                         | 14.325612 | 32.354466 | 7.183151  |
| O                                                        | 0.012702  | -0.025093 | 2.540961  | H                                                                         | 13.544133 | 30.433193 | 8.941454  |
|                                                          |           |           |           | O                                                                         | 16.814510 | 24.508622 | 3.935521  |
|                                                          |           |           |           | H                                                                         | 17.699878 | 24.211281 | 4.192781  |
|                                                          |           |           |           | H                                                                         | 16.452396 | 23.765011 | 3.432329  |
| <b>[MI-Fe<sup>III</sup>-P-NO...MI]<sup>+</sup>, Ms=1</b> |           |           |           | <b>[MI-Fe<sup>III</sup>-P-NO...MI]<sup>+</sup>...H<sub>2</sub>O, Ms=1</b> |           |           |           |
| C                                                        | 22.907000 | 29.056000 | 6.205000  | C                                                                         | 22.907000 | 29.056000 | 6.205000  |
| H                                                        | 23.442538 | 30.010422 | 6.012183  | H                                                                         | 23.450204 | 30.006570 | 6.013419  |
| H                                                        | 23.466161 | 28.235563 | 5.706371  | H                                                                         | 23.463741 | 28.232942 | 5.707303  |
| C                                                        | 21.507079 | 29.149304 | 5.698733  | C                                                                         | 21.510620 | 29.157876 | 5.691196  |
| N                                                        | 20.656751 | 30.142877 | 6.149137  | N                                                                         | 20.651467 | 30.135187 | 6.161052  |
| C                                                        | 20.866444 | 28.360606 | 4.758174  | C                                                                         | 20.885685 | 28.397024 | 4.719491  |
| H                                                        | 21.207027 | 27.494113 | 4.185814  | H                                                                         | 21.239421 | 27.552831 | 4.122077  |
| C                                                        | 19.527144 | 29.958945 | 5.491022  | C                                                                         | 19.531064 | 29.967182 | 5.483213  |
| H                                                        | 18.648000 | 30.582000 | 5.610000  | H                                                                         | 18.648000 | 30.582000 | 5.610000  |
| N                                                        | 19.593030 | 28.892441 | 4.635453  | N                                                                         | 19.610247 | 28.926896 | 4.598557  |
| H                                                        | 18.863912 | 28.562383 | 4.011500  | H                                                                         | 18.894599 | 28.623230 | 3.946325  |
| C                                                        | 7.892931  | 27.278532 | 2.880902  | C                                                                         | 7.722333  | 27.442889 | 2.369027  |
|                                                          |           |           |           | H                                                                         | 6.909240  | 26.959305 | 2.952925  |

|    |           |           |          |    |           |           |           |
|----|-----------|-----------|----------|----|-----------|-----------|-----------|
| H  | 8.113117  | 26.607263 | 2.116527 | H  | 7.960786  | 26.789510 | 1.505677  |
| C  | 9.103226  | 27.617679 | 3.724872 | C  | 8.946497  | 27.654422 | 3.198492  |
| N  | 9.150537  | 28.528532 | 4.771253 | N  | 8.982059  | 28.423392 | 4.352501  |
| H  | 8.374747  | 29.100557 | 5.090391 | H  | 8.189488  | 28.905928 | 4.765270  |
| C  | 10.369799 | 27.084908 | 3.666090 | C  | 10.237257 | 27.208235 | 3.034291  |
| H  | 10.757047 | 26.333303 | 2.976685 | H  | 10.636290 | 26.570847 | 2.243844  |
| C  | 10.398327 | 28.541412 | 5.295564 | C  | 10.245671 | 28.439403 | 4.839678  |
| H  | 10.712449 | 29.165400 | 6.129055 | H  | 10.554344 | 28.972381 | 5.736299  |
| N  | 11.168615 | 27.669365 | 4.641541 | N  | 11.037090 | 27.705721 | 4.054643  |
| FE | 13.168147 | 27.386082 | 4.922701 | FE | 13.051816 | 27.445647 | 4.266363  |
| C  | 13.610261 | 30.806382 | 4.817223 | C  | 13.371893 | 30.868027 | 4.605143  |
| H  | 13.787870 | 31.893954 | 4.787486 | H  | 13.508298 | 31.956102 | 4.716250  |
| C  | 12.749781 | 27.543525 | 8.345181 | C  | 12.671517 | 27.143055 | 7.680891  |
| H  | 12.658393 | 27.584368 | 9.442671 | H  | 12.591986 | 27.038838 | 8.775267  |
| C  | 12.691269 | 23.972568 | 5.024220 | C  | 12.649140 | 24.041992 | 3.921489  |
| H  | 12.566403 | 22.878485 | 5.061698 | H  | 12.528712 | 22.950774 | 3.813545  |
| C  | 13.621571 | 27.226098 | 1.507191 | C  | 13.479996 | 27.748189 | 0.860058  |
| H  | 13.802304 | 27.170849 | 0.421150 | H  | 13.649525 | 27.841151 | -0.225576 |
| N  | 13.166125 | 28.861478 | 6.289197 | N  | 13.016196 | 28.733351 | 5.812528  |
| C  | 13.405929 | 30.206229 | 6.060635 | C  | 13.209320 | 30.104069 | 5.761705  |
| C  | 13.408044 | 30.928336 | 7.309197 | C  | 13.207830 | 30.655426 | 7.095194  |
| C  | 13.172540 | 30.012338 | 8.301436 | C  | 13.018431 | 29.608239 | 7.959934  |
| C  | 13.024201 | 28.728653 | 7.660913 | C  | 12.900900 | 28.415945 | 7.156029  |
| N  | 12.733464 | 26.056873 | 6.362146 | N  | 12.674729 | 25.925594 | 5.523038  |
| C  | 12.600784 | 26.306930 | 7.716182 | C  | 12.555396 | 25.993429 | 6.899539  |
| C  | 12.327578 | 25.079278 | 8.426212 | C  | 12.328107 | 24.675249 | 7.445889  |
| C  | 12.304947 | 24.077755 | 7.493930 | C  | 12.316536 | 23.804534 | 6.390146  |
| C  | 12.567612 | 24.692163 | 6.213247 | C  | 12.543940 | 24.589542 | 5.199417  |
| N  | 13.159944 | 25.913944 | 3.558184 | N  | 13.076390 | 26.166154 | 2.723248  |
| C  | 12.973623 | 24.562592 | 3.791678 | C  | 12.908525 | 24.794671 | 2.775978  |
| C  | 13.108548 | 23.823057 | 2.560277 | C  | 13.032263 | 24.228170 | 1.455565  |
| C  | 13.376947 | 24.735445 | 1.573813 | C  | 13.278113 | 25.267395 | 0.596643  |
| C  | 13.405032 | 26.034570 | 2.200484 | C  | 13.298541 | 26.470611 | 1.391427  |
| N  | 13.475973 | 28.735603 | 3.464998 | N  | 13.300078 | 28.986595 | 2.994749  |
| C  | 13.637608 | 28.482045 | 2.114984 | C  | 13.464606 | 28.915883 | 1.624440  |
| C  | 13.875230 | 29.714588 | 1.400533 | C  | 13.657178 | 30.237846 | 1.075103  |
| C  | 13.868158 | 30.720291 | 2.329692 | C  | 13.617194 | 31.114382 | 2.126444  |
| C  | 13.627420 | 30.102458 | 3.612647 | C  | 13.403011 | 30.327896 | 3.318857  |
| O  | 15.890975 | 27.053622 | 5.303268 | O  | 15.789131 | 27.245550 | 4.616190  |
| H  | 7.587927  | 28.307438 | 2.351150 | H  | 7.334629  | 28.405810 | 1.969727  |
| H  | 22.934000 | 28.879000 | 7.306000 | H  | 22.934000 | 28.879000 | 7.306000  |
| H  | 12.174279 | 24.998476 | 9.510865 | N  | 14.653811 | 27.295600 | 4.458069  |
| H  | 12.129462 | 23.006190 | 7.656563 | H  | 12.194136 | 24.449324 | 8.512583  |
| H  | 13.015080 | 22.733055 | 2.463909 | H  | 12.169276 | 22.716744 | 6.413515  |
| H  | 13.546857 | 24.543122 | 0.506059 | H  | 12.943141 | 23.160769 | 1.212070  |
| H  | 14.032742 | 29.796823 | 0.316508 | H  | 13.436346 | 25.222543 | -0.489536 |

|   |           |           |          |   |           |           |          |
|---|-----------|-----------|----------|---|-----------|-----------|----------|
| H | 14.020694 | 31.795057 | 2.163204 | H | 13.808929 | 30.466680 | 0.011358 |
| H | 13.580632 | 32.008021 | 7.416542 | H | 13.731923 | 32.206628 | 2.100588 |
| H | 13.111200 | 30.190966 | 9.383590 | H | 13.347066 | 31.716471 | 7.344588 |
| N | 14.758205 | 27.184918 | 5.143602 | H | 12.970414 | 29.641262 | 9.057115 |
|   |           |           |          | O | 16.263501 | 24.279445 | 3.982502 |
|   |           |           |          | H | 17.159470 | 23.929966 | 4.111980 |
|   |           |           |          | H | 15.783907 | 23.542310 | 3.568400 |
